# Supplementary material for: Surface-Alloyed Nanoporous Zinc as Reversible and Stable Anodes for High-Performance Aqueous Zinc-Ion Battery
Source: Nanomicro Lett. 2022 Jun 14;14:128. doi: 10.1007/s40820-022-00867-9 (PMC9198195; doi:10.1007/s40820-022-00867-9)
Supplement: Supplementary file 1 — Supplementary file1 (PDF 2923 kb) [file 40820_2022_867_MOESM1_ESM.pdf]

Supporting Information for

## Surface-Alloyed Nanoporous Zinc as Reversible and Stable Anodes for High-Performance Aqueous Zinc-Ion Battery

Huan Meng<sup>1, #</sup>, Qing Ran<sup>1, #</sup>, Tian-Yi Dai<sup>1, #</sup>, Hang Shi<sup>1</sup>, Shu-Pei Zeng<sup>1</sup>, Yong-Fu Zhu<sup>1</sup>, Zi Wen<sup>1</sup>, Wei Zhang<sup>1</sup>, Xing-You Lang<sup>1, 2, \*</sup>, Wei-Tao Zheng<sup>1</sup>, Qing Jiang<sup>1, \*</sup>

<sup>1</sup>Key Laboratory of Automobile Materials (Jilin University), Ministry of Education, School of Materials Science and Engineering, and Electron Microscopy Center, Jilin University, Changchun 130022, P. R. China

<sup>2</sup>State Key Laboratory of Automotive Simulation and Control, Jilin University, Changchun 130022, P. R. China

# Huan Meng, Qing Ran and Tian-Yi Dai have contributed equally to this work

\*Corresponding authors. E-mail: [xylang@jlu.edu.cn](mailto:xylang@jlu.edu.cn) (Xing-You Lang), [jiangq@jlu.edu.cn](mailto:jiangq@jlu.edu.cn) (Qing Jiang)

### Supplementary Figures

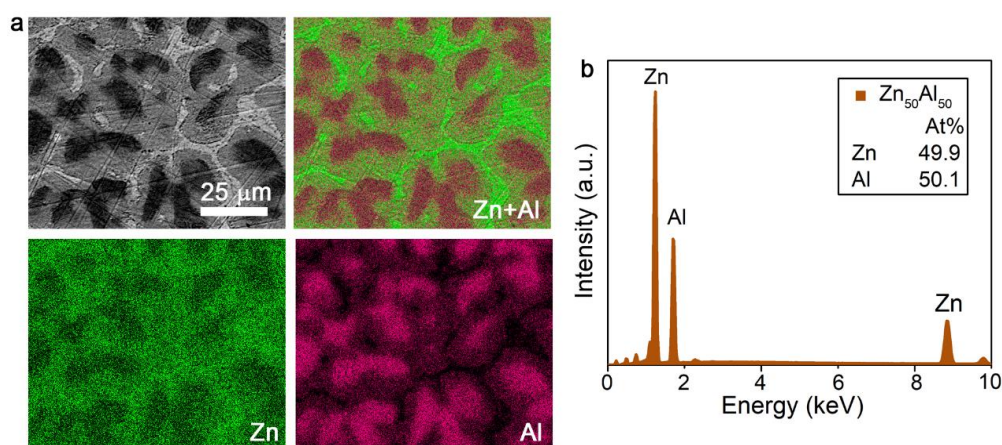

**Fig. S1** (a) Low-magnification SEM backscattered electron image of  $\text{Zn}_{50}\text{Al}_{50}$  precursor alloy and the corresponding EDS elemental mapping of Zn and Al, which are in green and purple, respectively. (b) EDS spectrum of  $\text{Zn}_{50}\text{Al}_{50}$  precursor alloy

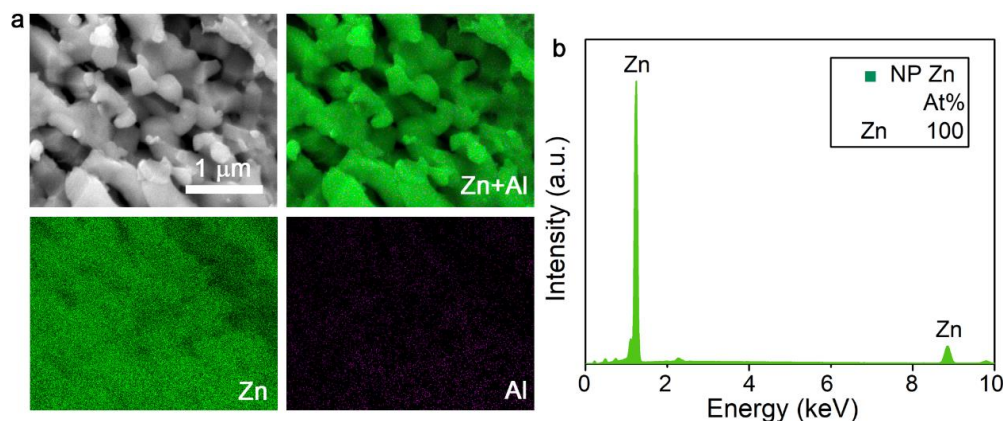

**Fig. S2** (a) Low-magnification SEM backscattered electron image of as-prepared nanoporous Zn sheets and the corresponding EDS elemental mapping of Zn and Al, which are in green and purple, respectively. (b) EDS spectrum of as-prepared nanoporous Zn sheets

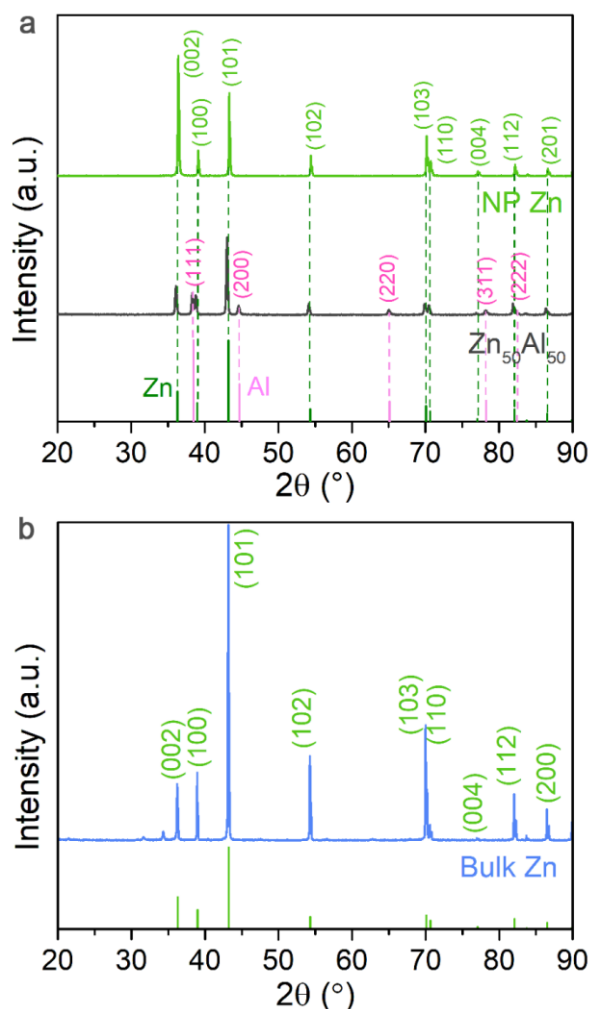

**Fig. S3** (a) XRD patterns of  $\text{Zn}_{50}\text{Al}_{50}$  precursor alloy and as-dealloyed nanoporous Zn in  $\text{N}_2$ -purged 1 M KOH solution. Therein, the nanoporous Zn is primarily composed of (002) plane. (b) XRD patterns of bulk Zn foil, which is primarily composed of (101) crystal plane

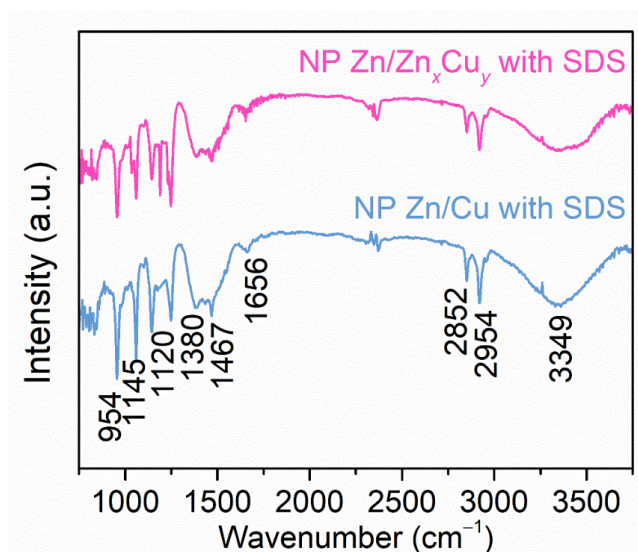

**Fig. S4** FTIR spectra of SDS grafted on nanoporous Zn/Cu and  $\text{Zn}_x\text{Cu}_y/\text{Zn}$ . The peak at 954  $\text{cm}^{-1}$  corresponds to the asymmetric stretching vibration of C-O-S of SDS. The peaks at 1380 and 1467  $\text{cm}^{-1}$  are symmetric and asymmetric deformation vibrations of  $-\text{CH}_3$ , respectively. The peaks at 2852 and 2954  $\text{cm}^{-1}$  are due to  $-\text{CH}_2$  symmetric and asymmetric stretching

vibrations respectively. In addition, the peaks at 1656 and 3349  $\text{cm}^{-1}$  are assigned to the characteristic peaks of water molecules adsorbed on the surface. Compared with those of SDS grafted on nanoporous Zn/Cu, the peaks of the SDS on nanoporous  $\text{Zn}_x\text{Cu}_y/\text{Zn}$  in the range of 700-1500  $\text{cm}^{-1}$  blue shift, indicating the charge transfer between the hydrophilic polar headgroup of SDS and the  $\text{Zn}_x\text{Cu}_y$  alloy. Meanwhile, in the FTIR spectrum of nanoporous  $\text{Zn}_x\text{Cu}_y/\text{Zn}$  with SDS, new peaks corresponding to S=O stretching vibration and  $\text{CF}_3$  asymmetric stretching vibration in  $\text{OTF}^-$  appear at 1033 and 1189  $\text{cm}^{-1}$ , respectively, due to the adsorption of  $\text{OTF}^-$  on the electrode surface during the cycling process. The peak of the two curves at 1145  $\text{cm}^{-1}$  may be attributed to the deviation of  $\text{SO}_4^{2-}$  characteristic peak of SDS head at 1220  $\text{cm}^{-1}$

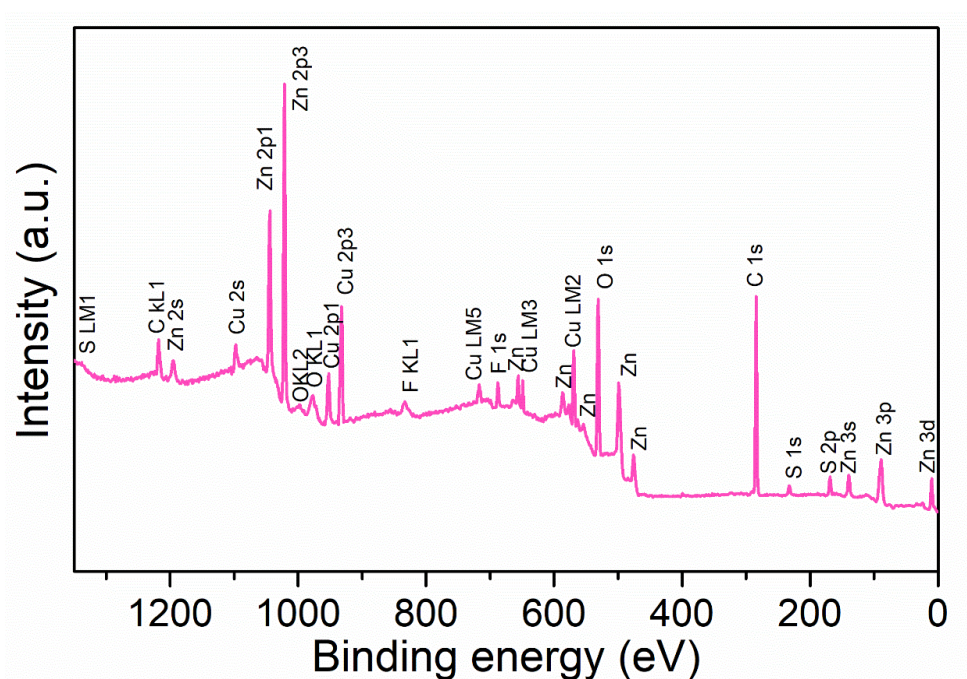

**Fig. S5** XPS survey spectrum of nanoporous  $\text{Zn}_x\text{Cu}_y/\text{Zn}$  electrode

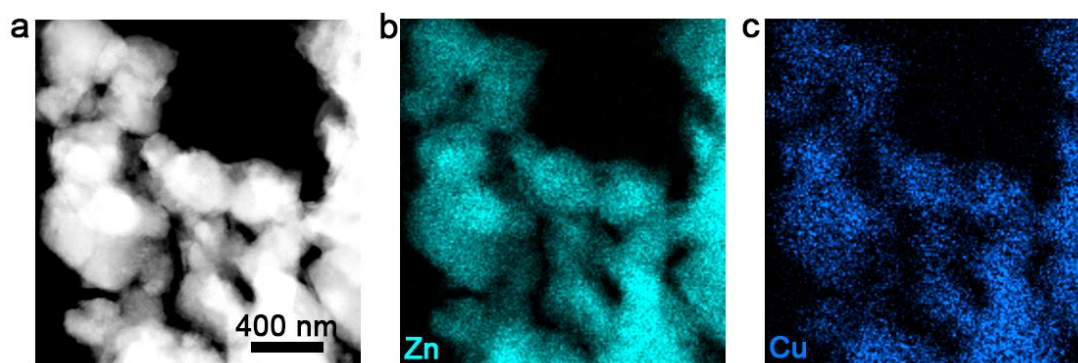

**Fig. S6** (a) STEM image and the corresponding (b) Zn and (c) Cu EDS elemental mapping of nanoporous  $\text{Zn}_x\text{Cu}_y/\text{Zn}$  electrode, with Zn in cyan and Cu in blue

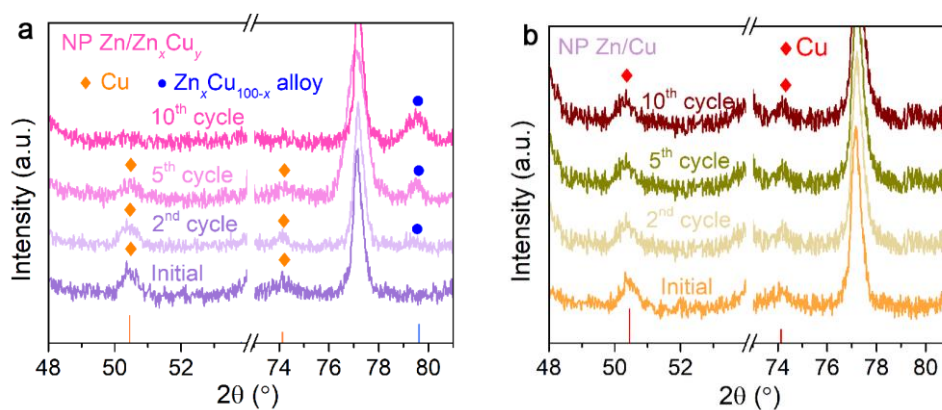

**Fig. S7** (a) Typical XRD patterns of nanoporous  $\text{Zn}_x\text{Cu}_y/\text{Zn}$ , of which the  $\text{Zn}_x\text{Cu}_y$  alloy shell in-situ forms on Zn core via surface alloying of Cu and Zn with the assistance of SDS during Zn stripping/plating processes. (b) Typical XRD patterns of nanoporous Cu/Zn, which keeps the initial Cu/Zn structure during Zn stripping/plating processes without the assistance of SDS

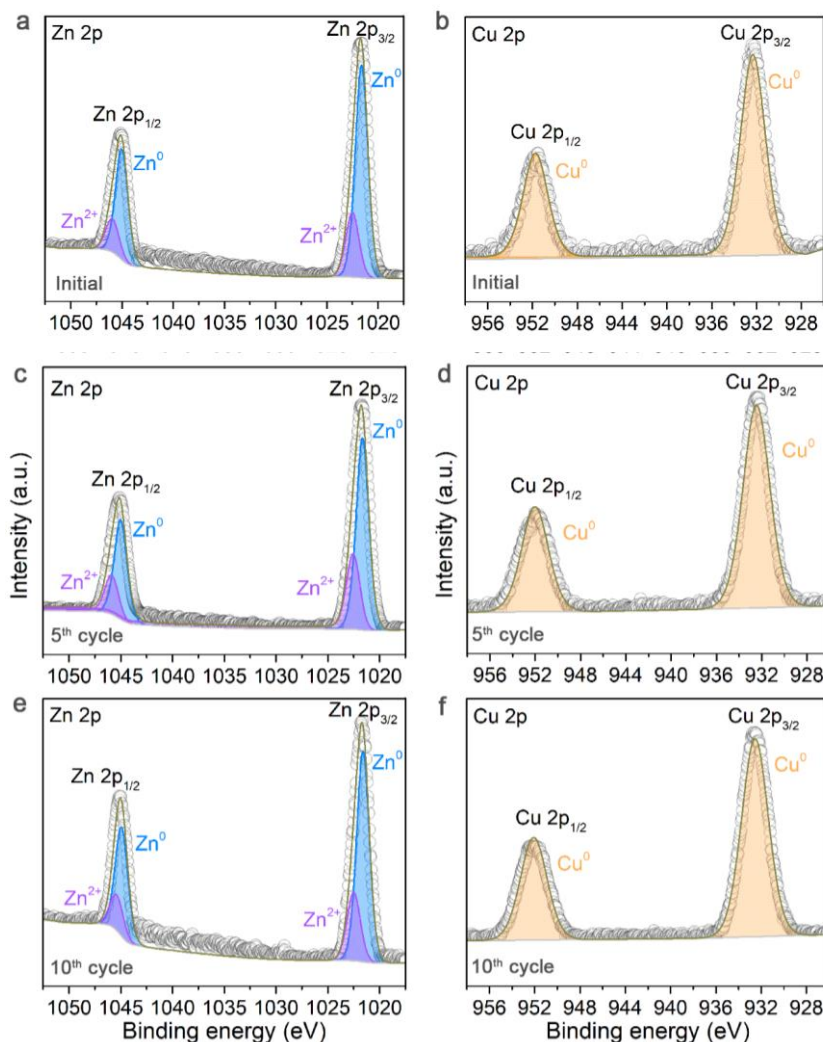

**Fig. S8** High-resolution XPS spectra of Zn 2p of nanoporous  $\text{Zn}_x\text{Cu}_y/\text{Zn}$  during the Zn stripping/plating for 0 (a), 5 (c) and 10 (e) cycles in 1 M  $\text{Zn}(\text{OTF})_2$  aqueous electrolyte with SDS additive. High-resolution XPS spectra of Cu 2p of nanoporous  $\text{Zn}_x\text{Cu}_y/\text{Zn}$  during the Zn stripping/plating for 0 (b), 5 (d) and 10 (f) cycles in 1 M  $\text{Zn}(\text{OTF})_2$  aqueous electrolyte with SDS additive

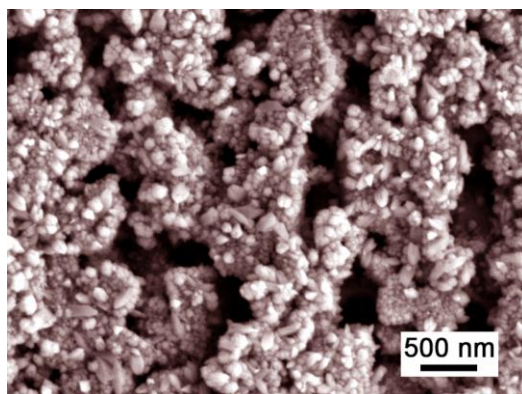

**Fig. S9** Representative SEM image of nanoporous Cu/Zn after Zn stripping/plating for 10 cycles in 1 M Zn(OTF)<sub>2</sub> without SDS additive

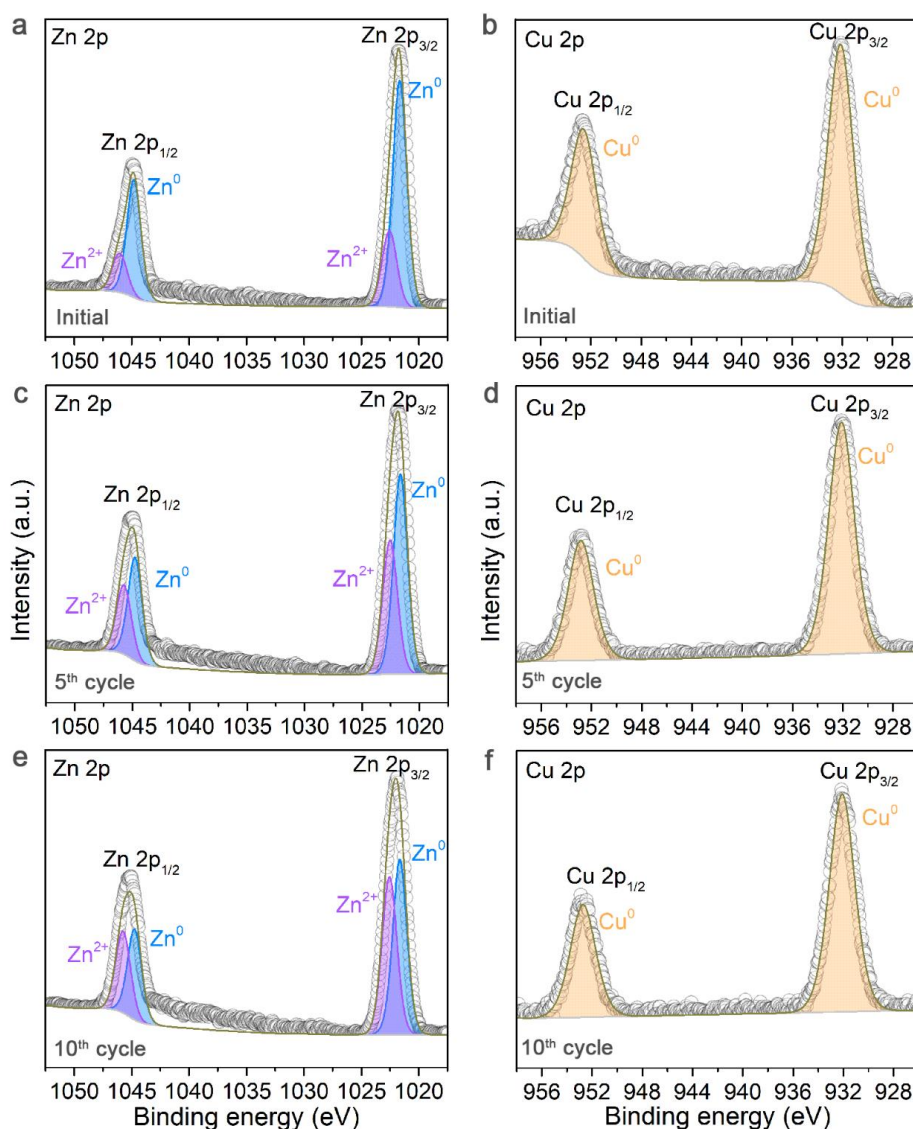

**Fig. S10** (a, c, e) High-resolution XPS spectra of Zn 2p of nanoporous Cu/Zn during the Zn stripping/plating for 0 (a), 5 (c) and 10 cycles (e) in 1 M Zn(OTF)<sub>2</sub> aqueous electrolyte without SDS additive. (b, d, f) High-resolution XPS spectra of Cu 2p of nanoporous Cu/Zn during the Zn stripping/plating for 0 (b), 5 (d) and 10 (f) cycles in 1 M Zn(OTF)<sub>2</sub> aqueous electrolyte without SDS additive

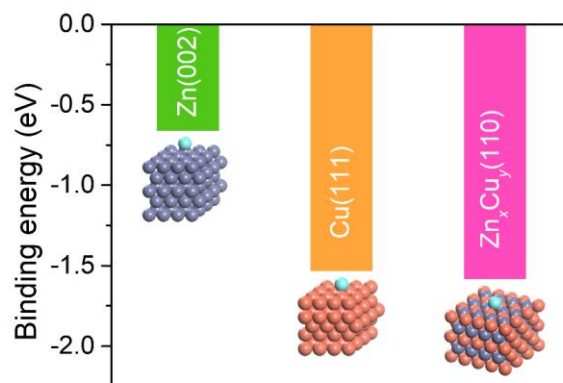

**Fig. S11** Comparison of binding energy for Zn atom deposition on Zn(002), Cu(111) and  $\text{Zn}_x\text{Cu}_y(110)$  surfaces. Insets: Configurations of one Zn atom deposition on the Zn(002), Cu(111) and  $\text{Zn}_x\text{Cu}_y(110)$  surfaces

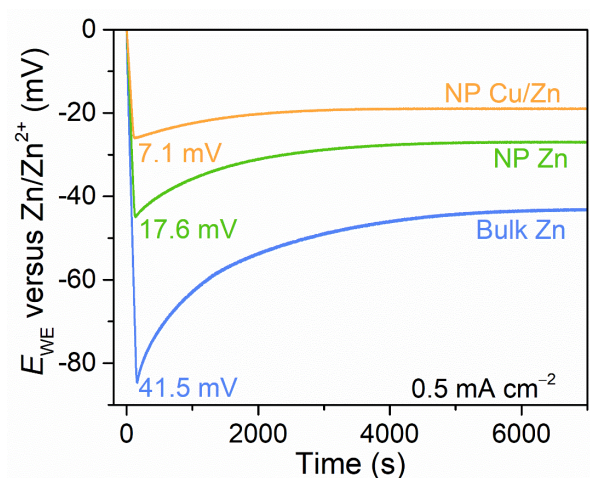

**Fig. S12** Comparisons of voltage profiles for galvanostatic Zn deposition on nanoporous Cu/Zn and Zn electrodes, as well as bulk Zn at  $0.5 \text{ mA cm}^{-2}$

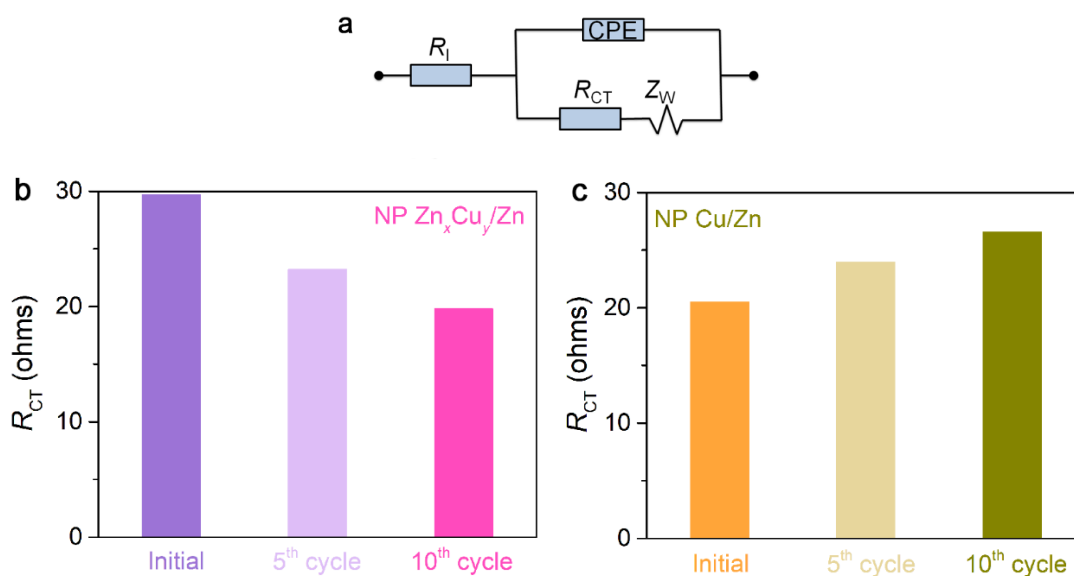

**Fig. S13** (a) The equivalent circuit with the general descriptors: the intrinsic resistance of both electrolyte and electrode ( $R_l$ ), the charge transfer resistance ( $R_{CT}$ ), the constant phase element (CPE) and the slope of the inclined line at flow frequencies corresponding to the Warburg resistance ( $Z_W$ ). (b) Comparison of  $R_{CT}$  values for nanoporous  $\text{Zn}_x\text{Cu}_y/\text{Zn}$  during the Zn stripping/plating for 0, 5 and 10 cycles in 1 M  $\text{Zn}(\text{OTf})_2$  aqueous electrolyte with SDS additive.

(c) Comparison of  $R_{CT}$  values for nanoporous Cu/Zn during the Zn stripping/plating for 0, 5 and 10 cycles in 1 M Zn(OTF)<sub>2</sub> aqueous electrolyte without SDS additive

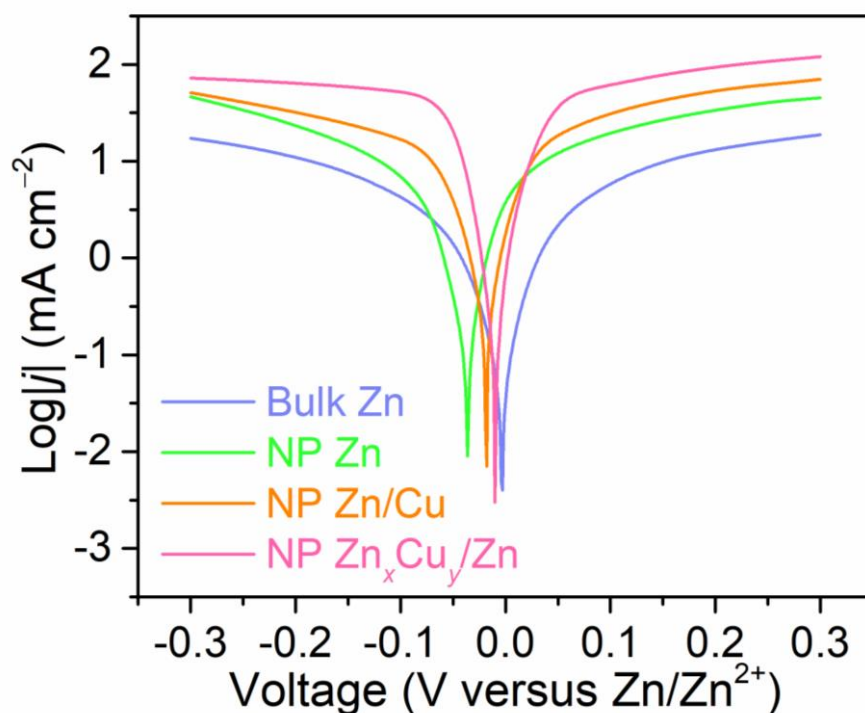

**Fig. S14** Tafel polarization curves of nanoporous Zn<sub>x</sub>Cu<sub>y</sub>/Zn, nanoporous Cu/Zn, nanoporous Zn and bulk Zn electrodes

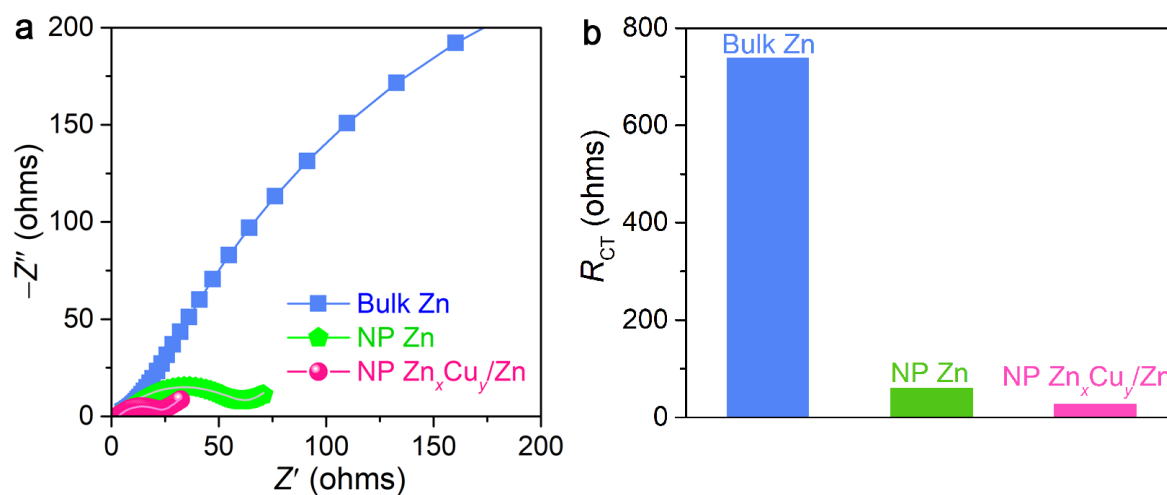

**Fig. S15** (a) EIS spectra of symmetric cells based on nanoporous Zn<sub>x</sub>Cu<sub>y</sub>/Zn, nanoporous Zn and bulk Zn electrodes. (b) Comparison of  $R_{CT}$  values for nanoporous Zn<sub>x</sub>Cu<sub>y</sub>/Zn, nanoporous Zn and bulk Zn electrodes

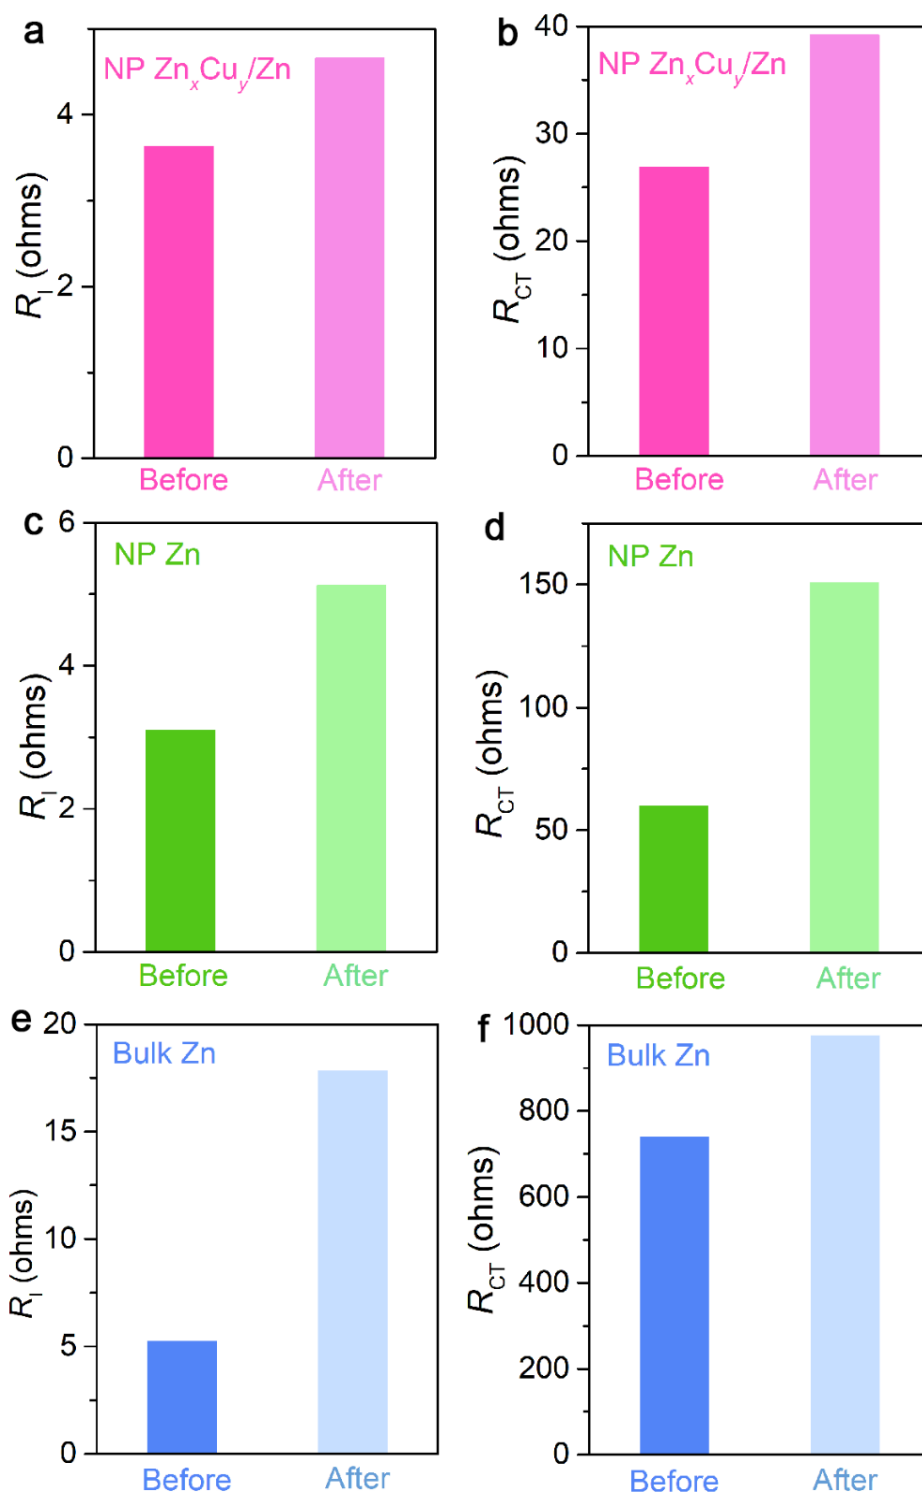

**Fig. S16** (a, b) Comparison of  $R_I$  (a) and  $R_{CT}$  (b) values for nanoporous  $Zn_xCu_y/Zn$  electrodes before and after 100 cycles of Zn stripping/plating in their symmetric cells. (c, d) Comparison of  $R_I$  (c) and  $R_{CT}$  (d) values for nanoporous Zn electrodes before and after 100 cycles of Zn stripping/plating in their symmetric cell. (e, f) Comparison of  $R_I$  (e) and  $R_{CT}$  (f) values for bulk Zn electrodes before and after 100 cycles of Zn stripping/plating in their symmetric cells

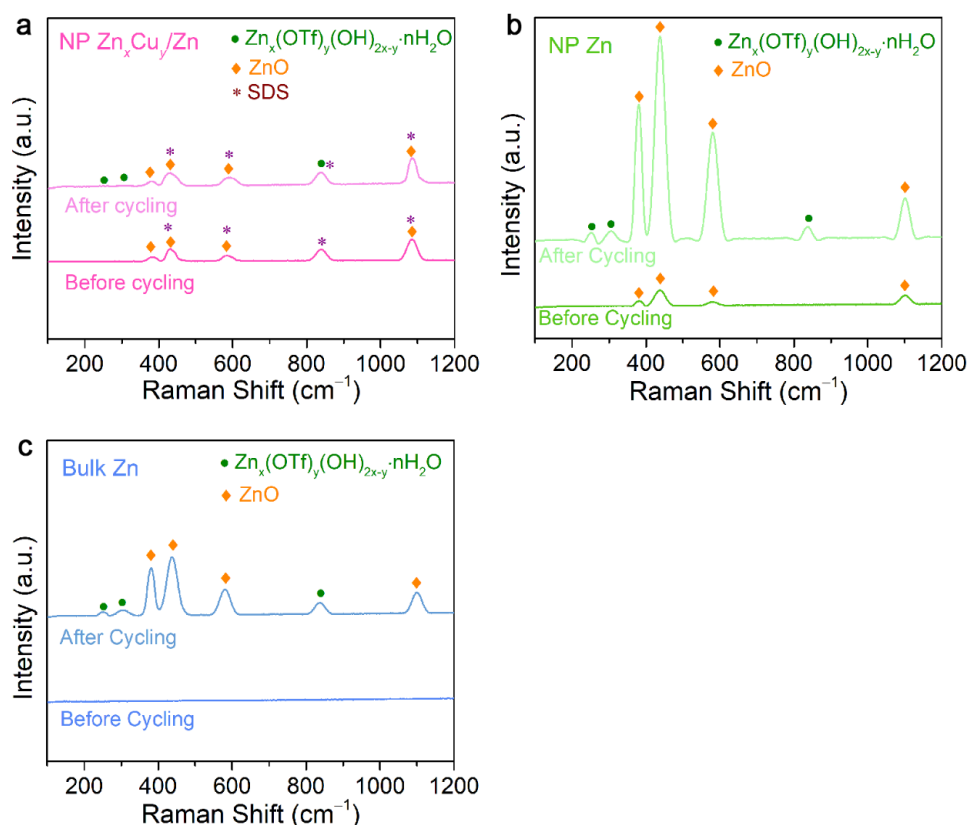

**Fig. S17 (a-c)** Raman spectra of nanoporous  $\text{Zn}_x\text{Cu}_y/\text{Zn}$  (a), nanoporous Zn (b) and bulk Zn (c) before and after Zn stripping/plating for 100 cycles, during which there generate additional by-products of  $\text{Zn}_x(\text{OTf})_y(\text{OH})_{2x-y} \cdot n\text{H}_2\text{O}$  and ZnO

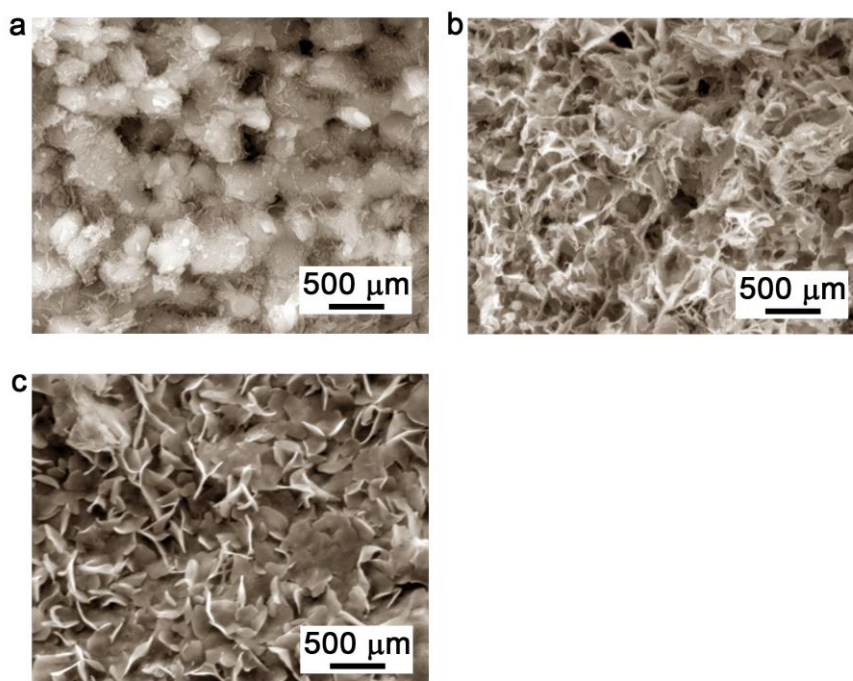

**Fig. S18 (a)** SEM image of nanoporous  $\text{Zn}_x\text{Cu}_y/\text{Zn}$  electrode after Zn stripping/plating for 500 cycles (1000 hours). **(b)** SEM image of nanoporous Zn electrode after Zn stripping/plating for 150 cycles (300 hours). **(c)** SEM image of bulk Zn foil after Zn stripping/plating for 50 cycles (100 hours)

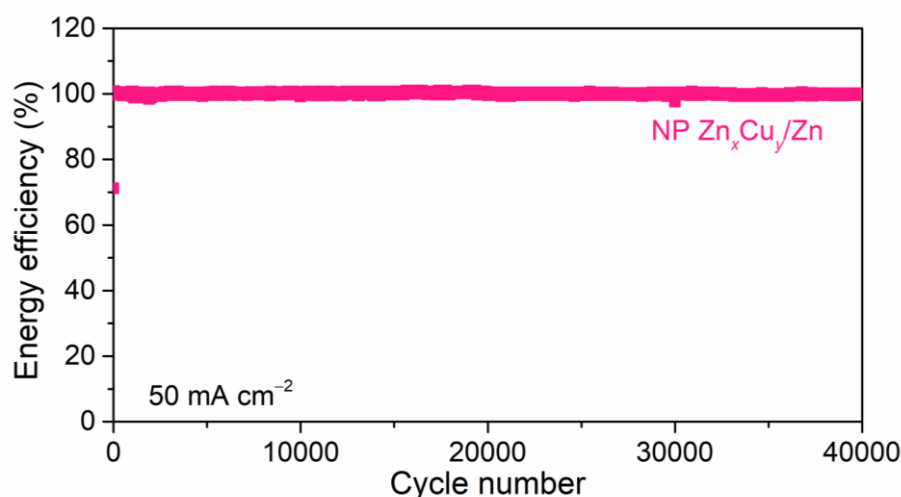

**Fig. S19** Energy efficiency of nanoporous  $\text{Zn}_x\text{Cu}_y/\text{Zn}$  electrodes during long-term cycling of Zn stripping/plating in 1 M  $\text{Zn}(\text{OTF})_2$  with 1 mM SDS at  $50 \text{ mA cm}^{-2}$

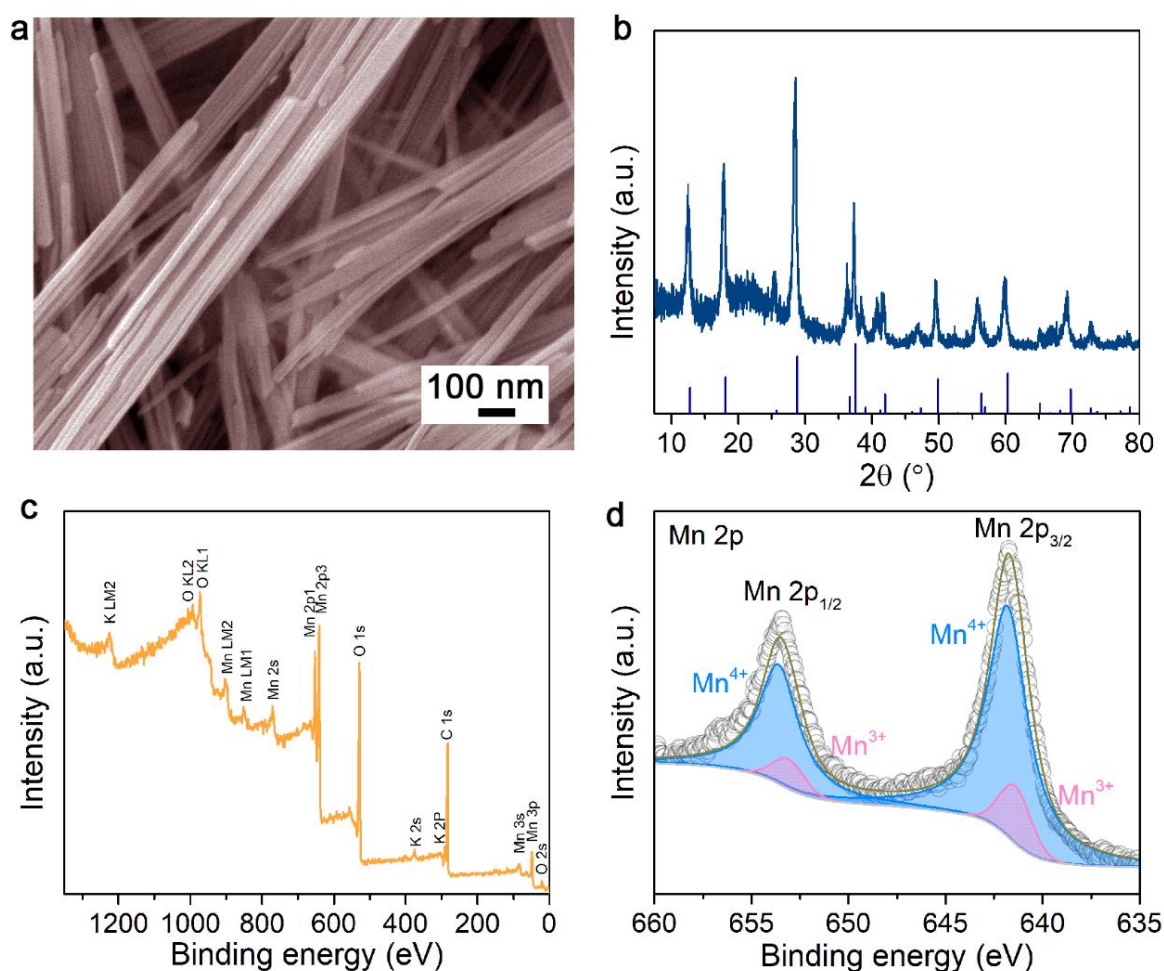

**Fig. S20** Structural and chemical characterizations of  $\text{K}_z\text{MnO}_2$  nanobelts. (a) Typical SEM image of as-prepared  $\text{K}_z\text{MnO}_2$  nanobelts. (b) XRD patterns of  $\text{K}_z\text{MnO}_2$  nanobelts. The line patterns show reference card 44-0141 for tetragonal phase of  $\alpha\text{-MnO}_2$  according to JCPDS. (c) XPS survey spectrum of as-prepared  $\text{K}_z\text{MnO}_2$  nanobelts, demonstrating the presence of preintercalated  $\text{K}^+$ . (d) High-resolution Mn 2p XPS spectrum of  $\text{K}_z\text{MnO}_2$  nanobelts

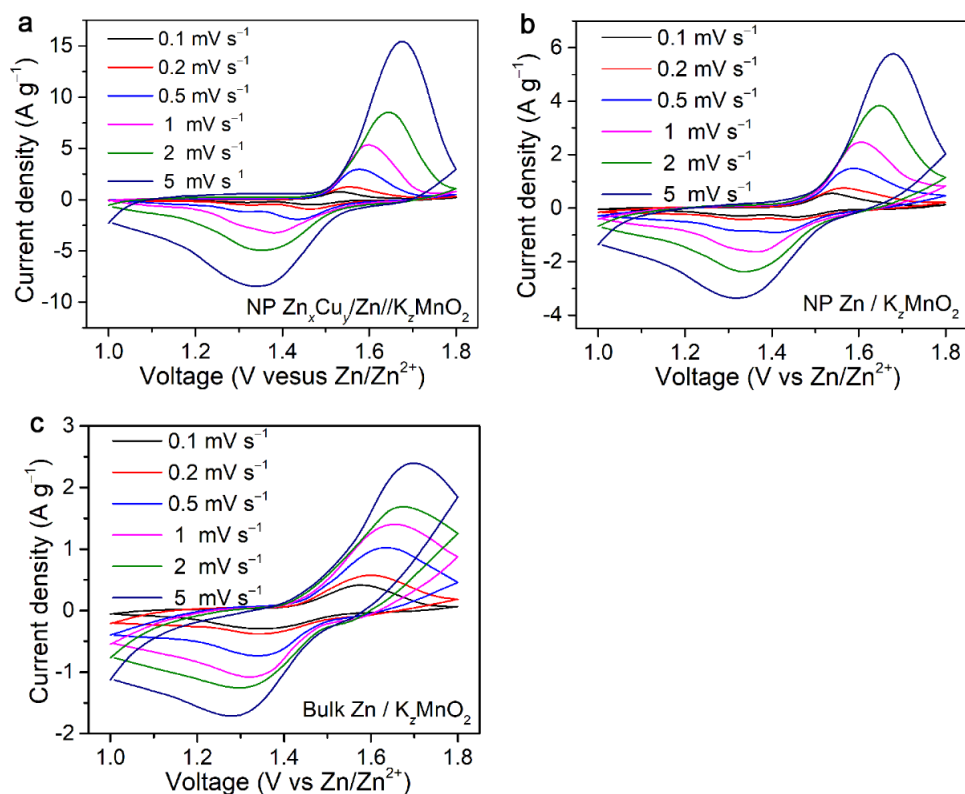

**Fig. S21 (a-c)** CV curves of full Zn-ion batteries of nanoporous  $\text{Zn}_x\text{Cu}_y/\text{Zn}/\text{K}_z\text{MnO}_2$  (a), nanoporous  $\text{Zn}/\text{K}_z\text{MnO}_2$  (b) and bulk  $\text{Zn}/\text{K}_z\text{MnO}_2$  (c) at various scan rates ranging from 0.1 to  $5 \text{ mV s}^{-1}$

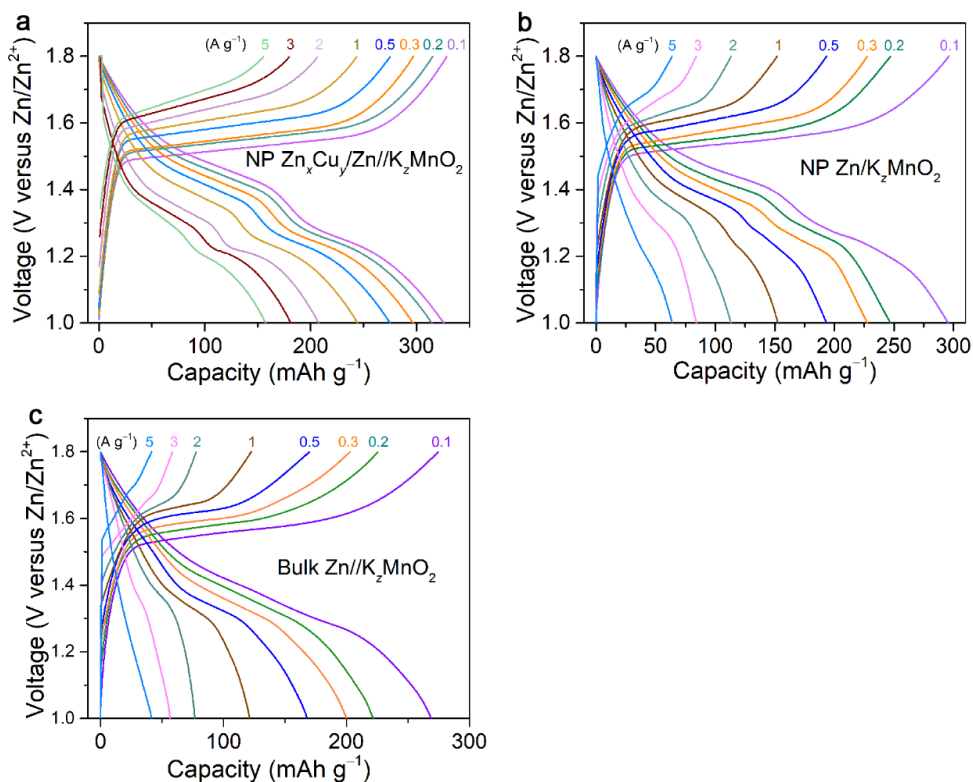

**Fig. S22 (a-c)** Voltage profiles of charge/discharge for full Zn-ion cells of nanoporous  $\text{Zn}_x\text{Cu}_y/\text{Zn}/\text{K}_z\text{MnO}_2$  (a), nanoporous  $\text{Zn}/\text{K}_z\text{MnO}_2$  (b) and bulk  $\text{Zn}/\text{K}_z\text{MnO}_2$  (c) at the specific currents ranging from 0.1 to  $5 \text{ A g}^{-1}$ . The applied specific current and the achieved specific capacity are calculated according to the loading mass of electroactive  $\text{K}_z\text{MnO}_2$  in the cathode

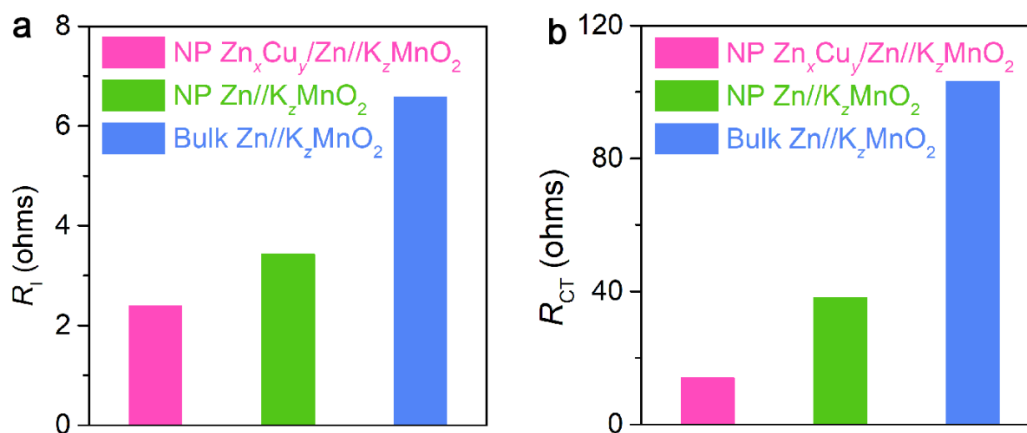

**Fig. S23 (a,b)** Comparison of  $R_1$  (a) and  $R_{CT}$  (b) values for nanoporous  $Zn_xCu_y/Zn//K_zMnO_2$ , nanoporous  $Zn//K_zMnO_2$  and bulk  $Zn//K_zMnO_2$  AR-ZMB devices

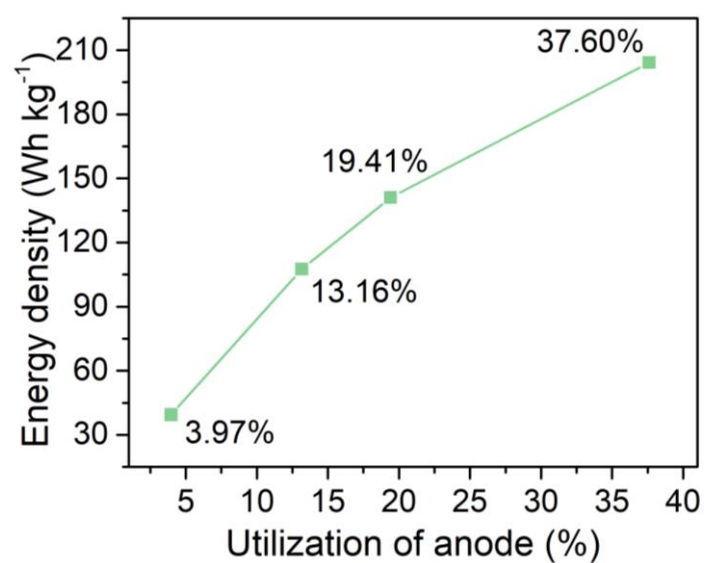

**Fig. S24** Dependence of cell-level energy density on Zn utilization of anode in nanoporous  $Zn_xCu_y/Zn//K_zMnO_2$  full cells

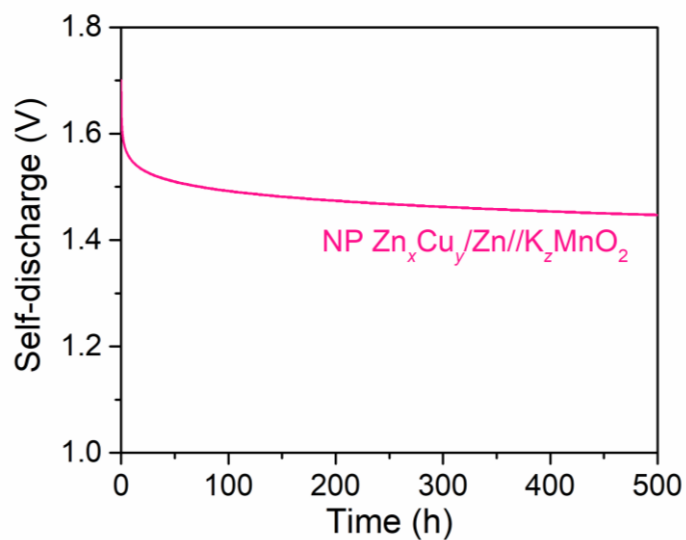

**Fig. S25** Self-discharge profile for nanoporous  $Zn_xCu_y/Zn//K_zMnO_2$  full cell

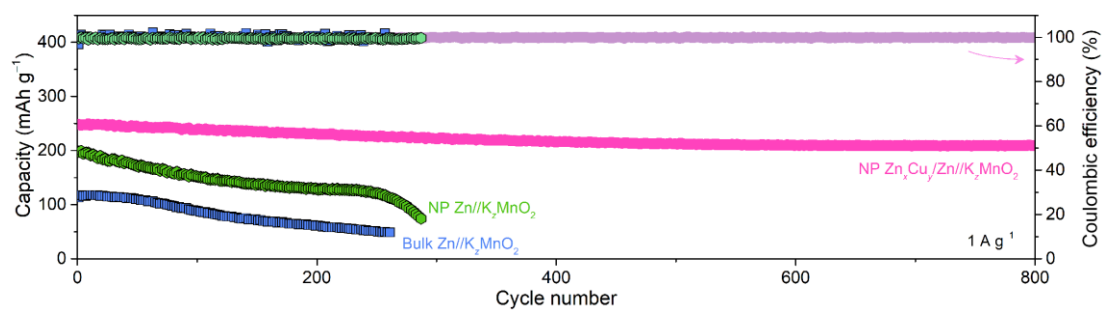

**Fig. S26** Comparisons of capacity retentions and coulombic efficiencies for nanoporous  $\text{Zn}_x\text{Cu}_y/\text{Zn}/\text{K}_2\text{MnO}_2$ , nanoporous  $\text{Zn}/\text{K}_2\text{MnO}_2$  and bulk  $\text{Zn}/\text{K}_2\text{MnO}_2$  cells in a long-term charge/discharge cycling measurements at the specific current of  $1 \text{ A g}^{-1}$
